## **SV<sup>2</sup>: Accurate Structural Variation Genotyping and *De Novo* Mutation**

### **Detection**

**Danny Antaki<sup>1,2,3,4</sup>, William M Brandler<sup>1,2,3</sup>, & Jonathan Sebat<sup>1,2,3</sup>**

<sup>1</sup>Beyster Center for Genomics of Psychiatric Diseases, University of California San Diego, La Jolla, CA 92093 <sup>2</sup>Department of Psychiatry, University of California San Diego, La Jolla, CA 92093 <sup>3</sup>Department of Cellular and Molecular Medicine and Pediatrics, University of California San Diego, La Jolla, CA 92093 <sup>4</sup>Biomedical Sciences Graduate Program, University of California San Diego, La Jolla, CA 92093

### **Abstract:**

Structural Variation (SV) detection from short-read Illumina whole genome sequencing is error prone, presenting significant challenges for analysis in particular, *de novo* mutations. Here we describe SV<sup>2</sup>, a machine-learning algorithm for genotyping deletions and tandem duplications from paired-end whole genome sequencing data. SV<sup>2</sup> can rapidly integrate variant calls from multiple structural variant discovery algorithms into a unified callset with low rates of false discoveries and Mendelian errors, accurate *de novo* detection with no transmission bias in families.

### **Introduction:**

Structural Variation (SV) is a change of the structure of a chromosome larger than 50bp. SV is a major contributor to human genetic variation with 13% of the human genome defined as structurally variable<sup>1</sup>, and is also implicated in a variety of human diseases<sup>2,3</sup>. *De novo* germline

SV contribute risk for many congenital disorders, particularly where there is no family history, such as idiopathic autism or intellectual disability<sup>4</sup>. Putative de novo mutations, however are enriched for errors as they require only a single false SV call, either a false positive in the child or a false negative in the parent. Errors in inherited variant calling only occur if both the parent and child have false positive calls at the same locus. Accurate genotyping is therefore particularly important for de novo mutation discovery. Also, given that structural variation can range in size from 50bp to 50Mb, typically multiple tools are required to fully capture SVs<sup>1,5</sup> with each operating as a standalone solution relying on read depth<sup>6,7</sup> or discordant paired-ends and split-reads<sup>8,9</sup>. The resulting variants require integration where even for the most common classes of SV such as deletions and tandem duplications, a clear strategy to harmonize genotypes and their likelihoods is lacking.

Here we present SV<sup>2</sup> (support-vector structural-variant genotyper), a turn-key solution for unifying SV predictions into an integrated set of genotypes and likelihoods. SV<sup>2</sup> (<https://www.github.com/dantaki/SV2>) is an open source software written in Python that exploits read depth, discordant paired-ends, and split-reads in a supervised support vector machine classifier<sup>10</sup>. Required inputs include a BAM file with supplementary alignment tags (SA), a SNV VCF file with allelic depth, and either a BED or VCF file of deletions and tandem duplications to be genotyped. The final product is a VCF file with genotypes and annotations for genes, repeats, and other befitting statistics for SV analysis.

## **Main**

The training set for the genotyping classifiers applies whole genome data and a gold standard of SV positions and genotypes with a reported false discovery rate (FDR) of 1-4%<sup>1</sup>

from the 1000 Genomes Project (1KGP). SV<sup>2</sup> combines features from paired-end reads that are descriptive of the copy number state, each of which are implemented in SV prediction tools for next generation sequencing and SNV microarrays<sup>7-10</sup>. Features extracted from variants in 27 unrelated high coverage (48x) samples include depth of coverage, discordant paired-ends, split-reads, and heterozygous allelic depth (HAD) ratio (Figure 1A&B). Given the small number of duplications in the high coverage samples, the duplication training set included 2,493 low coverage (7x) genomes, altogether employing over 32,000 deletions and 22,000 tandem duplications (Supplementary Table1) in six classifiers (Methods).

We initially sought determination of SV<sup>2</sup>'s genotyping performance with cross-validation. We calculated the mean receiver operating characteristic (ROC) curve of 7 folds, maintaining the proportion of classes in the full training set. We found the average area under the curve (AUC) for deletions as 0.98 and for tandem duplications as 0.88 (Figure 1B&D). ROC curves for the remaining classifiers (Supplementary Figure 1&2) produced similar AUCs with the exception of the hemizygous deletion classifier. We suspect the suboptimal AUC of the hemizygous deletion classifier to be driven by incorrect gold standard genotypes indicated by the lack of separation of the coverage features, in contrast to the hemizygous duplication training set (Supplementary Figure 2B&D).

We extended our evaluation of genotype performance using Illumina 2.5M SNV arrays taken from 17 previously published<sup>4</sup> families, totaling 57 individuals. In brief, SV calls were generated using LUMPY<sup>9</sup> and Manta<sup>8</sup> on high coverage whole genomes, merged according to 50% reciprocal overlap, and genotyped by SV<sup>2</sup> (Methods). False discovery rates (FDR) of SV<sup>2</sup> genotypes were estimated via the Intensity Rank Sum test which produced a FDR of 40% for

both unfiltered deletions and duplications. At a Phred-adjusted genotype likelihood cutoff of 20, the FDR drops to 1% for deletions and 0% for duplications (Figure 2A). Unfiltered *de novo* variants carry a high FDR, which we estimated to be 60% for deletions and 86% for duplications which fell to 0% for both SV types at a Phred-adjusted score of 20.

Relying on SNV arrays for genotype accuracy is not sufficient since it is limited to events encompassing probes, which are typically larger variants (>5kb). Hence we further enhanced our estimate of SV<sup>2</sup>'s genotyping performance with long read whole genome alignments with PacBio Single Molecule Real-Time (SMRT) technology obtained from the 1KGP. SVs called with LUMPY and Manta were genotyped and merged with SV<sup>2</sup> using complementary paired-end high coverage (74x) genomes for three probands. We then queried PacBio SMRT alignments for supporting reads, defined as split-reads with breakpoints overlapping at least 80% to the paired-end prediction on chromosome 1. SVs were omitted if the PacBio coverage was less than 5 standard deviations from the chromosome mean; likewise, SVs intersecting our genome mask were removed (Methods). We defined true positive variants as those with at least one supporting read, which resulted in a FDR for unfiltered deletions at 20% and duplications at 35%. At a SV<sup>2</sup> Phred-adjusted cutoff of 20, a mean FDR of 7.2% was determined for deletions. However, duplications poorly recapitulate the SNV array results, generating a 30% FDR (Figure 2A). We suspect our reliance on available bwamem aligned genomes using split-reads hinders our performance estimates. Other methods of SV calling for PacBio SMRT sequences, such as *de novo* assembly, have been described<sup>11</sup>, but these data are not yet publicly available.

Next, we further complemented our performance analysis by leveraging family-based inheritance, providing an alternative route for estimating genotyping accuracy<sup>12</sup>. We calculated

the mean rate of Mendelian errors in 630 probands and their parents, resulting in a total 1,852 samples: 1,554 of which were provided by the Simons Simplex Collection (<https://sfari.org/>). Briefly, these samples were sequenced to high depths (>30x, read lengths > 100bp) and had SV called by ForestSV<sup>7</sup>, LUMPY<sup>9</sup>, and Manta<sup>8</sup> with accompanying SV<sup>2</sup> genotype scores. SVs were merged and then excluded if the overlap to repetitive elements and gaps exceeded 50% (Methods). For each proband, we determined the average Mendelian error rate at varying genotype likelihood cutoffs and allele frequencies. Rare variants with lower genotype likelihood scores were more prone to Mendelian inconsistencies, in contrast to rare variants with higher scores, suggesting that SV<sup>2</sup> reliably assigns low scores to false positives. Common variants had higher rates of Mendelian errors only at higher genotype likelihoods, which has been observed previously for SVs<sup>13</sup>. The average Mendelian error rate at a Phred-adjusted cutoff of 20 was 0.0027 (95% CI [0.0021,0.003]) for deletions and 0.022 (95% CI [0.13,0.32]) for duplications (Figure 2B).

Further validation incorporated the group-wise transmission disequilibrium test<sup>14</sup>, a robust measure of specificity<sup>15</sup>. Bias towards under-transmission signifies either an abundance of type I errors in the parents, and/or of type II errors in the child, complicating tests of family-based association and *de novo* mutation calling. We calculated the average percent of transmitted variants in 630 probands described above. Unfiltered variants exhibited an undertransmission bias of 48.6% for both deletions and duplications ( $P = 1.03 \times 10^{-9}$  for deletions, 0.02 for duplications). However, at a Phred-adjusted genotype likelihood filter at 20, the percent of transmitted variants was 50.05% ( $P = 0.88$ ) for deletions and 50.11% ( $P = 0.75$ ) for duplications (Figure 2C).

After confirming SV<sup>2</sup> genotypes deletions and tandem duplications accurately, we created stringent filters for *de novo* mutations leveraging variant size and feature availability, and taking advantage of experimentally validated<sup>4</sup> *de novo* mutations as a benchmark (Supplementary Table 2). We applied the stringent filters in a larger cohort (N=3,169) and estimated the FDR for *de novo* SV predicted by SV<sup>2</sup> to be 4% for variants >500bp (data not shown). We then compared SV<sup>2</sup>'s stringent filters to default filters for SVTyper and Manta and determined the FDR of rare variants filtered by either SVTyper, Manta, or SV<sup>2</sup> genotype likelihoods. Deletions filtered by SVTyper and Manta carried a 1.0% and 1.6% FDR respectively, in contrast to SV<sup>2</sup> with 0%. Likewise, a 7.9% FDR was observed for duplications filtered by SVTyper and 9.6% for Manta, but with 0% FDR for SV<sup>2</sup>. We then assessed the FDR of putative *de novo* mutations filtered by either method. SVTyper's filters returned 18 putative *de novo* mutations with a 22.2% FDR, while Manta's filters produced 13 with 46.2% FDR. SV<sup>2</sup>'s filtering resulted in 9 variants with 0% FDR (Supplementary Figure 3), demonstrating SV<sup>2</sup>'s ability to accurately reconcile putative *de novo* mutations.

SV<sup>2</sup> compared to other SV genotyping software is noteworthy because of its exploitation of machine learning to reliably genotype and score deletion and tandem duplication predictions without compromising sensitivity. One of SV<sup>2</sup>'s advantages to comparable SV genotyping solutions is the ability to genotype breakpoints overlapping repetitive elements using read depth. Additionally, SV<sup>2</sup>'s incorporation of heterozygous allelic depth is better able to genotype tandem duplications, which are more prone to false positive genotypes due to fluctuations in read depth. However, relying on the presence of SNVs limits more accurate genotyping to events larger than 3kb. A caveat of SV<sup>2</sup> is that it cannot assign a copy number greater than 4, but this can be addressed with the addition of more gold standard examples. Ultimately, SV<sup>2</sup>'s strength is

harmonizing genotypes and likelihoods from multiple callers and genotypers, simplifying analysis of SV and providing a well needed tool for accurately resolving *de novo* mutations.

## Figure Legends:

### Figure 1: SV<sup>2</sup> Training Set and Cross Validation Performance

**A:** Kernel density estimates of 1000 Genomes phase 3 deletions less than 1kbp (left) and duplications (right) in 27 high coverage samples. Colors represent the gold standard genotype, while copy number on the X axis is a function of depth of coverage. **B:** Depicts the average ROC curve of 7-fold cross validation of the training sets in A, shaded areas represent the 95% confidence interval. The average AUC across all copy numbers for deletions was 0.98 and for duplications 0.88.

### Figure 2: SV<sup>2</sup> Genotyping Evaluation

**A:** False discovery rate estimates from SNV microarrays and PacBio SMRT long reads for deletions (left) and tandem duplications (right). Black dotted line indicates 5% FDR. Unfiltered SV call sets have high rates of false positives (~40%) for both SNV arrays and PacBio SMRT reads. Likewise, unfiltered *de novo* mutations, had a FDR of 60% for deletions and 86% for duplications, estimated from SNV arrays. At a Phred-adjusted cutoff of 20, deletions have FDR of ~2% and 0% for duplications based on SNV arrays. Similarly, FDRs of 7% for deletions and 30% for duplications were produced using PacBio SMRT long reads. **B:** Mendelian error rates in 630 probands for deletions (left) and duplications (right). SV<sup>2</sup> reliably assigns poor genotype

scores to false positives. Rare variants with high genotype scores tended to have fewer Mendelian inconsistencies. Deletions had an error rate of 0.0027 (95% CI[ 0.002,0.003]) and duplications an error rate of 0.022 (95% CI[0.13,0.32]) at a Phred-adjusted cutoff of 20. **C:** Group-wise transmission disequilibrium tests in 630 probands for deletions (left) and duplications (right) with 95% confidence intervals in the shaded region. Unfiltered calls were biased towards under-transmission of variants with an average bias of 48.6% ( $P=1.03 \times 10^{-9}$  deletions, 0.02 duplications). Under-transmission biases are mitigated with increasing genotype likelihood scores, at a filter of 20 an average of 50.05% ( $P=0.88$ ) of deletions and 50.11% ( $P=0.75$ ) of duplications were transmitted.

### **Supplementary Figure 1: Training Set Cross Validation Performance**

**A:** Cross validation performance of the deletion training set of variation >1kb was performed in similar fashion to Figure 1B. The Mean AUC of 7 folds was determined to be 0.98. Shaded area represents 95% confidence intervals. **B:** Depicts the cross validation performance of the paired-end duplication training set, with 2,494 low coverage samples. The mean AUC was determined to be 0.84.

### **Supplementary Figure 2: Hemizygous Training Set Cross Validation Performance**

**A:** Cross validation performance of the hemizygous deletion classifier with a mean AUC of 0.68 (shaded areas indicate 95% confidence intervals). We suspect the suboptimal results of cross validation to be due to incorrect genotyping in the gold standard, shown in **B** where the distribution of coverage between the two classes is not significant. In contrast, the hemizygous duplication classifier performance in **C** had a mean AUC of 0.98 with distinct separation of copy



number groups in **D**. Sample weights applied to each training method compensate for possible genotype errors in the gold standard (Methods).

### **Supplementary Figure 3: Genotype Likelihood Filter and *De Novo* Prediction Performance**

False discovery rates for deletions (left) and duplications (center) filtered by default filters for Manta and SVTyper and strict filters for *de novo* mutation discovery for SV<sup>2</sup>. FDRs were estimated using SNV arrays and binned according to size. While the default filters for Manta and SVTyper perform well with FDRs less than 2% for deletions and 10% for duplications, SV<sup>2</sup>'s strict filters produce 0% FDR. For putative *de novo* mutations (right), SV<sup>2</sup> produces 0% FDR in contrast to Manta and SVTyper.

#### **Methods:**

##### *SV<sup>2</sup> Workflow*

SV<sup>2</sup> is a high-throughput SV genotyper which requires BAM alignments with supplementary reads (SA tags), a bgzipped and tabix indexed VCF with allelic depth for variants, and a BED or VCF file of deletion and tandem duplication positions to be genotyped. SV<sup>2</sup> first performs a preprocessing step that records basic statistics of each sample. Then SV<sup>2</sup> operates on each variant extracting informative features for genotyping with support vector machine classifiers. A final VCF with genotypes as well as repeat elements, 1KGP phase 3 variant overlap, and gene annotations are produced.

##### *Machine Learning Features of SV<sup>2</sup>*

We sought to leverage SV genotyping with four orthogonal features: depth of coverage, discordant paired-ends, split reads, and heterozygous allelic depth (HAD) ratio. Coverage was defined as either the number of reads spanning a locus or as the median base-pair depth for lengths  $\leq 1$  kbp. Reads were excluded if they aligned within our genome mask comprising of segmental duplications, short tandem repeats, assembly gaps, telomeres, and centromeres. Raw coverage values were normalized according the chromosome average, and then adjusted based on GC content with respect to PCR or PCR-free chemistries, adapted from CNVator<sup>16</sup>. We defined discordant paired-ends to have insert sizes greater than the chromosome median plus 5 times the median absolute deviation. To reduce noise, we limited the search for discordant paired-ends and split-reads to  $\pm 500$  bp of the start and end positions of the SV. Likewise, only discordant paired-ends and split-reads were included if the mate-pair or the supplementary alignment mapped to the opposite side of the breakpoint. The resulting number of discordant paired-ends and split-reads was then normalized to the number of concordant reads within the locus. Akin to B-allele frequency on SNV microarrays<sup>10</sup>, HAD was defined as the median ratio of coverage of the minor allele to the major allele for all heterozygous variants encompassing the SV.

### *SV<sup>2</sup> Training Set*

Features were obtained from 27 PCR-free high coverage whole genomes (48x, 250bp read length) and 2,494 low coverage whole genomes (7x, 100bp read length) provided by 1KGP<sup>17</sup>. SV positions were obtained from the 1KGP phase three structural variation call set<sup>1</sup>, retaining alleles with at least one alternate variant in the cohort. Due to the large number of samples for the paired-end duplication classifier, we randomly selected 100,000 homozygous reference examples for the final training set. Features were also excluded if the estimated copy

number was greater than 10. Sample weights for training were defined as the inverse distance of expected coverage of the phase 3 genotype. The expected normalized coverage for homozygous reference was 1.0. The remaining expected coverages either add or subtract 0.5 from 1.0 according to the number of copies gained or lost. Training samples for the HAD classifier were weighted according to the inverse Euclidian distance of expected coverage and mean HAD value of each copy number class to compensate for allelic dropout.

### *SV<sup>2</sup> Classifier Parameter Selection*

SV<sup>2</sup> genotypes SV with a support vector machine model with a radial basis function kernel from scikit-learn<sup>18</sup>. Support vector machine classifiers are governed by the parameters C and gamma, which represent the error of classification and the influence of training samples. Parameter sweeps of varying C and gamma values were performed with balanced class weights, with the exception of the paired-end duplication classifier which used heuristic class weights. Parameters were chosen by optimizing false discovery rate (SVtoolkit) and sensitivity of validated *de novo* variants in a previously published cohort<sup>4</sup>.

### *Cross Validation*

We assessed the performance of the training sets with seven-fold cross validation, where each fold maintained the proportion of copy number classes in the full training set. Using the 1KGP phase 3 SV genotypes as truth, the mean ROC and area under the curve was determined for each genotype class (Figure 1B&D, Supplementary Figure 2).

### *SV Genotyping Performance with SNV Arrays*

We evaluated false discovery rates at varying genotype likelihood cutoffs using Illumina 2.5M SNV microarrays and SV calls from high coverage, paired-end whole genomes were obtained from 57 samples described previously<sup>4</sup>. Raw LUMPY<sup>9</sup> and Manta<sup>8</sup> calls were merged

according to 50% reciprocal overlap, while removing any call that overlapped 50% of its length to a repeat element or an assembly gap. False discovery rates were obtained for the resulting call set using the IRS test from SVtoolkit.

### *SV Genotyping Performance with PacBio Single Molecule Real-Time Sequencing*

We chose 3 probands sequenced using PacBio Single Molecule Real-Time (SMRT) from the 1KGP since they had higher coverage than the parents (proband mean depth = 38.9, parent mean depth=18.6). Raw reads (mean length= 8,345.2bp) were aligned to GRCh38 with bwa mem with the `-x pacbio` option. We then restricted our analysis to chromosome 1 to comply with 1KGP data release policy for unpublished data. SV calls from LUMPY and Manta were genotyped and merged with SV<sup>2</sup> using complementary Illumina paired-end whole genomes sequenced to deep depths (74.2X) with 125bp reads. We defined supporting reads as PacBio split-reads with breakpoints that reciprocally overlap 80% to SVs genotyped in the paired-end alignments. We omitted loci if the coverage of PacBio reads over a 10kb span of either the start or end position was less than 5 standard deviations from the mean chromosome coverage. Loci were also removed if either one of the breakpoints overlapped an element in our genome mask, in addition to removing calls if the region overlapped 50% to masked elements. False positives were defined as ALT genotypes without supporting PacBio split-reads, while true positives required 1 supporting read.

### *SV Genotyping Performance Leveraging Inheritance*

We measured rates of Mendelian errors in 630 high coverage whole genome probands (1884 total individuals). 1,551 of the samples were obtained from the Simons Simplex Collection. SVs were called using ForestSV, LUMPY, and Manta. Raw calls were then genotyped by SV<sup>2</sup> and then merged after filtering. SVs with greater than 50% overlap to regions

defined in our genome mask were removed. For each proband the number of inconsistent genotypes with respect to the parents was taken as a ratio to Mendelian consistent genotypes. We performed this analysis at varying alternate genotype likelihood cutoffs and allele frequencies and recorded the mean Mendelian error rate for the cohort. Rates of SV transmission were measured with group-wise transmission disequilibrium test (gTDT)<sup>14</sup>. 95% confidence intervals were estimated as 2 times the Z score for the dominant model.

#### *Construction of De Novo Mutation Filters*

Strict genotype likelihood filters were determined using the IRS test from SVtoolkit on previously mentioned sampled. *De novo* variants previously validated by PCR and Sanger sequencing<sup>4</sup> were used as a guide in determining appropriate filters. We created a set of conditions that consider feature availability and the length of the SV for filters and found the FDR of *de novo* variants, including those not previously validated, to be 0%. However, in a companion paper using a larger cohort of 3,169 individuals a FDR of 8% was estimated using an orthogonal *in silico* method for large SV and PCR for smaller SV.

#### *Comparison of Genotype Likelihood Filters*

We compared SV<sup>2</sup>'s strict genotype likelihood filters to default filters from SVTyper and Manta. Variants were called by these two methods and filtered as described above. We restricted this comparison to rare variants defined as less than 1% allele frequency in parents. The FDR for each filter were determined using the IRS test from SVtoolkit while binning on the size of the SV (Supplementary Figure 3). Variants less than 100bp were omitted since genotype poorly on SNV arrays. Putative *de novo* variants were defined as those where both parents are homozygous reference with the proband genotyping as a gain or loss of one copy.

#### **References:**

- 1 Sudmant, P. H. *et al.* An integrated map of structural variation in 2,504 human genomes. *Nature* **526**, 75-81, doi:10.1038/nature15394 (2015).
- 2 Conrad, D. F. *et al.* Origins and functional impact of copy number variation in the human genome. *Nature* **464**, 704-712 (2010).
- 3 Zaidi, S. *et al.* De novo mutations in histone-modifying genes in congenital heart disease. *Nature* **498**, 220-223 (2013).
- 4 Brandler, W. M. *et al.* Frequency and Complexity of De Novo Structural Mutation in Autism. *Am J Hum Genet* **98**, 667-679, doi:10.1016/j.ajhg.2016.02.018 (2016).
- 5 Consortium, G. o. t. N. Whole-genome sequence variation, population structure and demographic history of the Dutch population. *Nature Genetics* **46**, 818-825 (2014).
- 6 Handsaker, R. E. *et al.* Large multiallelic copy number variations in humans. *Nature genetics* **47**, 296-303 (2015).
- 7 Michaelson, J. J. & Sebat, J. forestSV: structural variant discovery through statistical learning. *Nat Methods* **9**, 819-821, doi:10.1038/nmeth.2085 (2012).
- 8 Chen, X. *et al.* Manta: rapid detection of structural variants and indels for germline and cancer sequencing applications. *Bioinformatics* **32**, 1220-1222, doi:10.1093/bioinformatics/btv710 (2016).
- 9 Layer, R. M., Chiang, C., Quinlan, A. R. & Hall, I. M. LUMPY: a probabilistic framework for structural variant discovery. *Genome Biol* **15**, R84, doi:10.1186/gb-2014-15-6-r84 (2014).
- 10 Wang, K. *et al.* PennCNV: an integrated hidden Markov model designed for high-resolution copy number variation detection in whole-genome SNP genotyping data. *Genome Res* **17**, 1665-1674, doi:10.1101/gr.6861907 (2007).
- 11 Huddleston, J. *et al.* Discovery and genotyping of structural variation from long-read haploid genome sequence data. *Genome Research*, gr. 214007.214116 (2016).
- 12 Li, B. *et al.* A likelihood-based framework for variant calling and de novo mutation detection in families. *PLoS Genet* **8**, e1002944, doi:10.1371/journal.pgen.1002944 (2012).
- 13 Zhang, D. *et al.* Accuracy of CNV detection from GWAS data. *PLoS One* **6**, e14511 (2011).
- 14 Chen, R. *et al.* A haplotype-based framework for group-wise transmission/disequilibrium tests for rare variant association analysis. *Bioinformatics* **31**, 1452-1459 (2015).
- 15 Yan, Q. *et al.* The impact of genotype calling errors on family-based studies. *Sci Rep* **6**, 28323, doi:10.1038/srep28323 (2016).
- 16 Abyzov, A., Urban, A. E., Snyder, M. & Gerstein, M. CNVnator: an approach to discover, genotype, and characterize typical and atypical CNVs from family and population genome sequencing. *Genome Res* **21**, 974-984, doi:10.1101/gr.114876.110 (2011).
- 17 Consortium, G. P. A global reference for human genetic variation. *Nature* **526**, 68-74 (2015).
- 18 Buitinck, L. *et al.* API design for machine learning software: experiences from the scikit-learn project. *arXiv preprint arXiv:1309.0238* (2013).

Figure 1

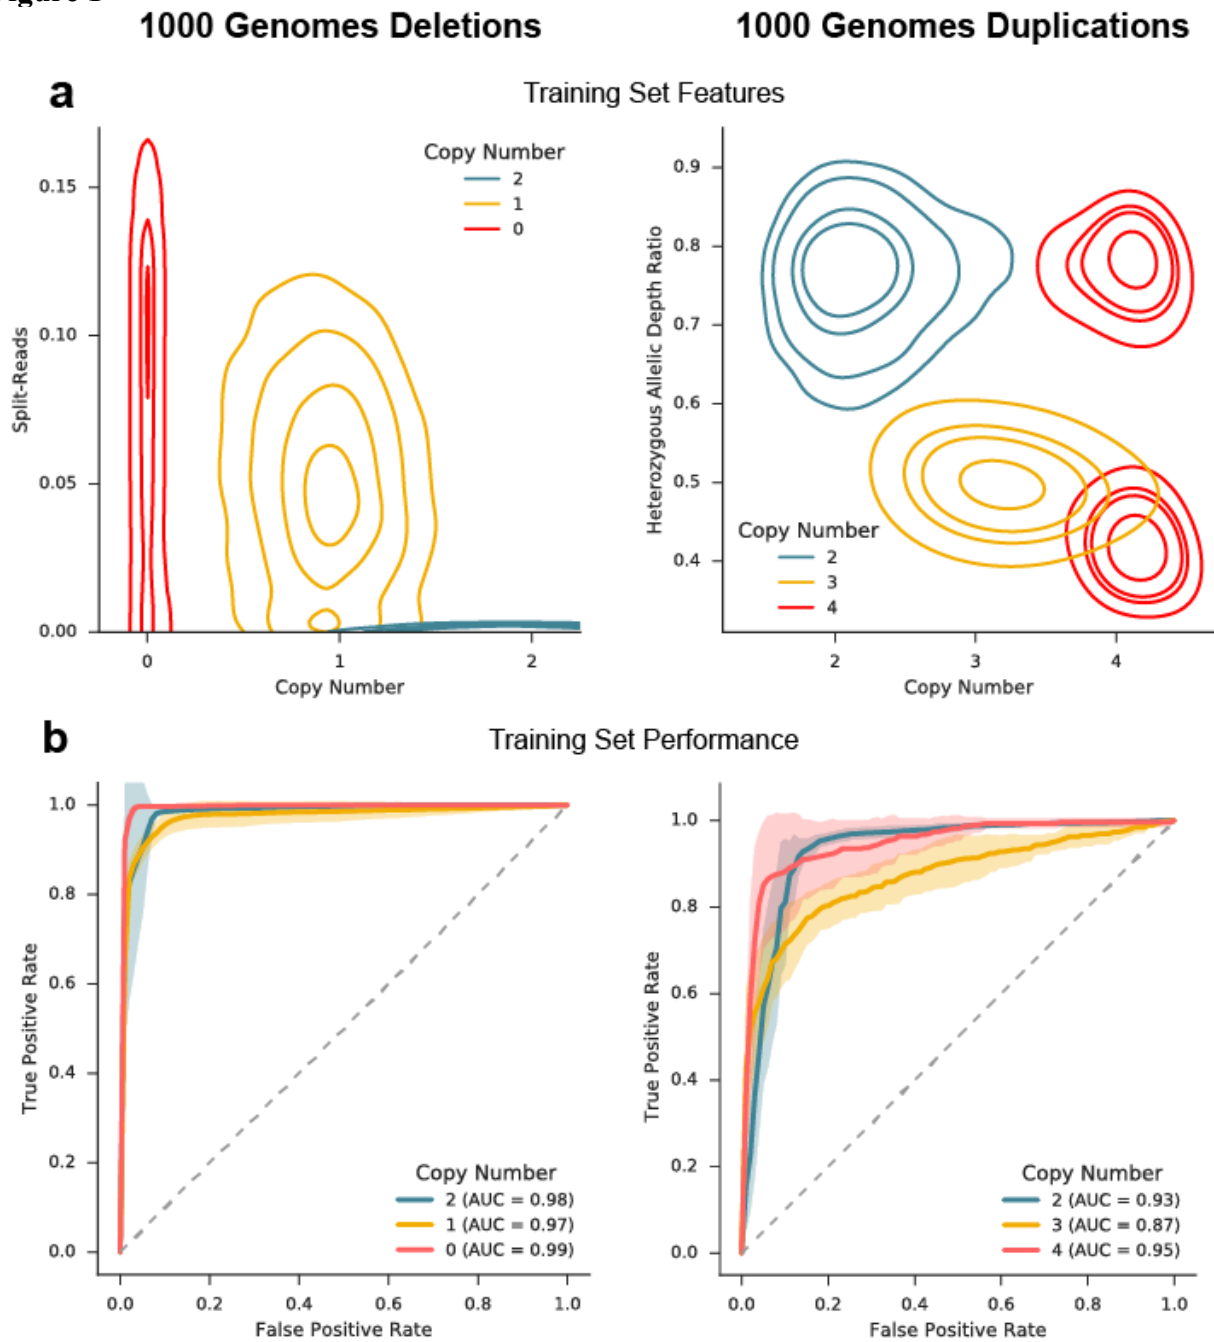

Figure 2

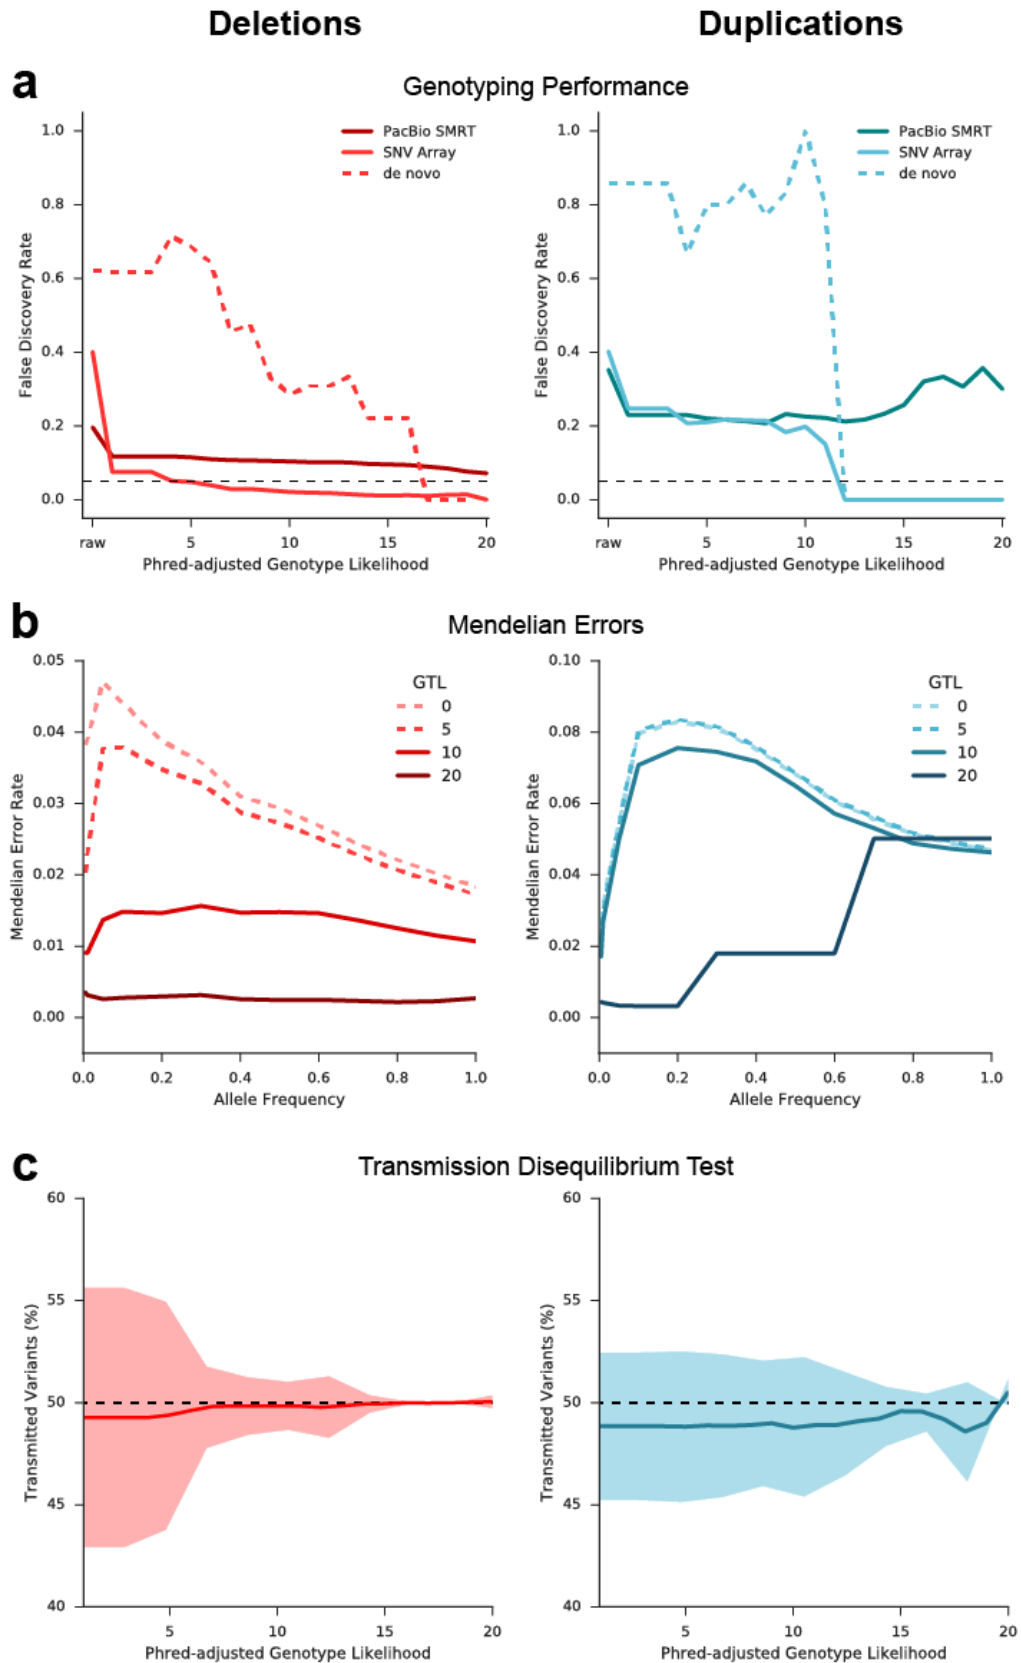



## Supplementary Figure 1

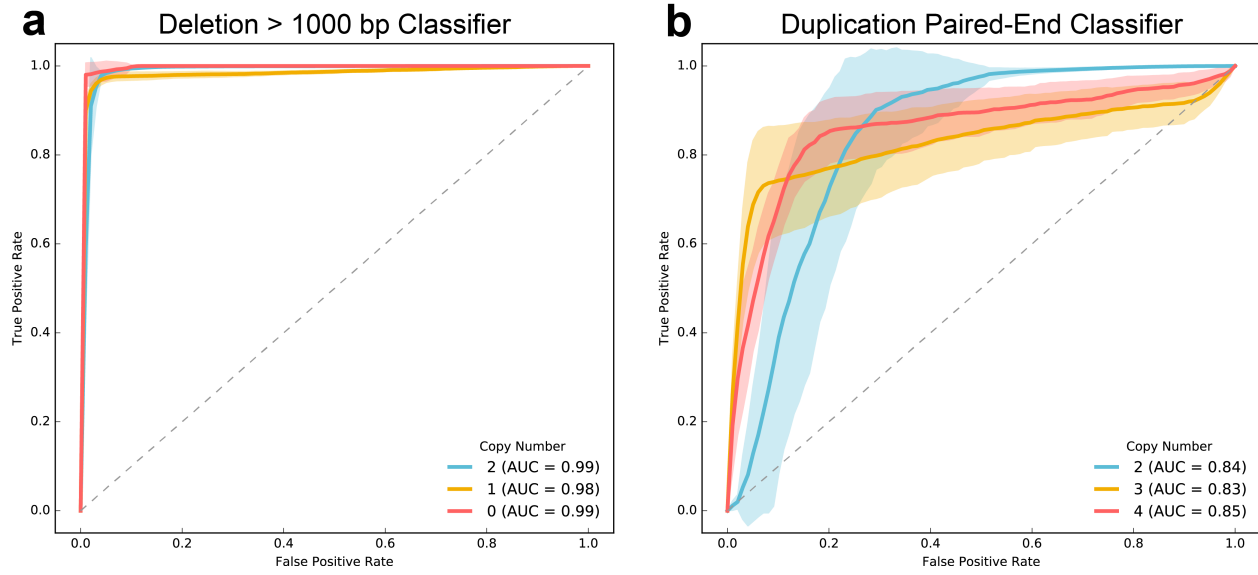

## Supplementary Figure 2

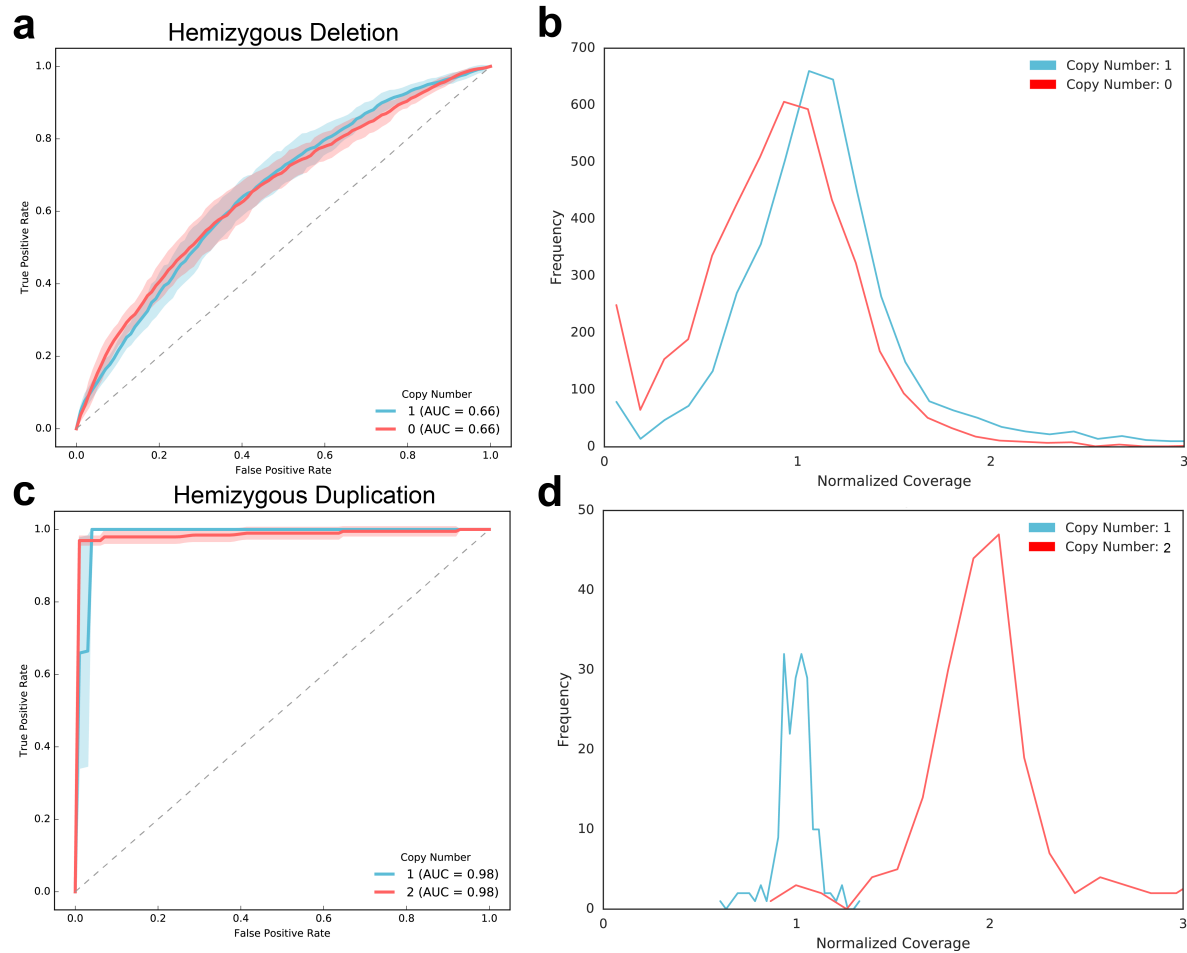

### Supplementary Figure 3 Deletions

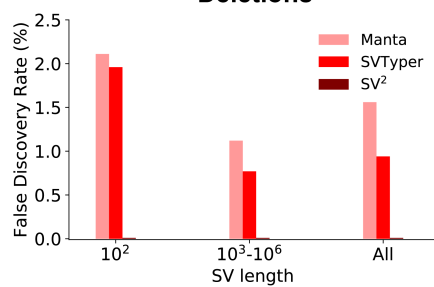

### Duplications

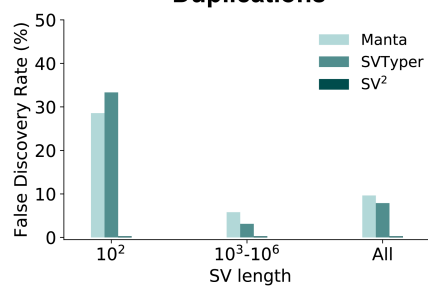

### De novo mutations

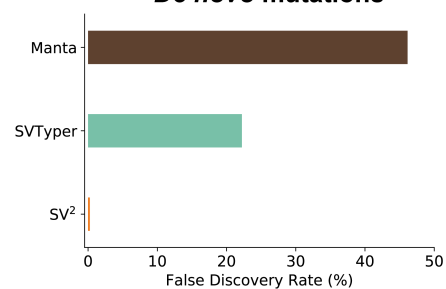

Supplementary Table 1: SV<sup>2</sup> Training Set Variant Counts

Supplementary Table 2: SV<sup>2</sup> Strict Filters for *De Novo* Mutation Discovery
